# Supplementary material
Source: PubMed Central journal article supplement (PMC1142535)
Supplement: 7600604s1.pdf [file 7600604s1.pdf]

## Supplementary Material

**Supplementary Table I** List of primers.

| Gene         | Name (abbreviation) | Sequence                          |
|--------------|---------------------|-----------------------------------|
| <i>SUVH1</i> | Su1start            | ATAGTCGACCGCATGGAAAGAGGTGGTCAC    |
|              | Su1-stop            | ATAGTCGACTCCAAATGAGCCACGGCAATACGC |
|              | Su1-Start/NheI      | ATAGCTAGCATGGAAAGAAATGGTGGTACA    |
|              | Su1-Stop            | ATACTCGAGAAATGAGCCACGGCAATACGC    |
|              | Su1r908 (O)         | TAACGCATCAAACCGCATAA              |
|              | Su1f592 (P)         | ACCAAGCTCAGAACCCACCG              |
| <i>SUVH2</i> | Su2Start (F)        | ATAGTCGACATGAGTACATTGTTACCA       |
|              | Su2Stop             | ATAGTCGACCTAGTTGCAGATGGCGAG       |
|              | Su2StartNheI        | ATAGCTAGCATGAGTACATTGTTACCA       |
|              | Su2Xho              | ATACTCGAGGTTGCAGATGGCGAGCTTG      |
|              | Su2-1631B (H)       | ATAACATCCCCATTGATTGACAG           |
|              | mycSalI             | ATAGTCGACATGGGCGGACGCGAACAAAAGTTG |
|              | 2RNAi3X/Bstop       | ATAGGATCCCTCGAGGCTCGTTCACCTTCAT   |
|              | 2RNAi5-BamHI        | ATAGGATCCCTCAATCCTCCACCG          |
|              | 2RNAi5XB            | ATACTCGAGGGATCCCCCAAACCAGACTTCCCC |
|              | 2RNAi3BamHI         | ATAGGATCCTTTGCTGTGGGGAAGTCT       |
|              | Su2-1290F (K)       | GATCAGCAGGACTGGCTGCGAG            |
|              | Su2r545 (G)         | TCTCGCTAGGTCTCTCGGTC              |
|              | Su2f527             | GACCGACGAGAGACCTAGCGAGA           |
|              | <i>SUVH3</i>        | Su3r1447 (R)                      |
| Su3f1150 (S) |                     | GAGGATGCAGCTTCGAAAAC              |
| <i>SUVH4</i> | Su4r1227 (M)        | CTCGGCAGTTACACCCAGTT              |
|              | Su4f1010 (N)        | TGGACGCATACCAACGAGTA              |
|              | A                   | AGAAATTGAGTGTTTCTCTGAATGG         |
|              | B                   | GCATTGTCTAGATCATCCTCGTACT         |
|              | C                   | TGGTTCACGTAGTGGGCCATCG            |
|              | D                   | CAATTGATTTCCATGTGGTATTGTA         |
|              | E                   | AGATTGTGATTAAGCTCAGATTTGG         |

| Gene              | Name (abbreviation) | Sequence                         |
|-------------------|---------------------|----------------------------------|
| T-DNA             | 35S-1HindIII        | GAAAGAATGCTAACCCACAGATG          |
|                   | 35sd2fwd            | AGGGTAATAT(CT)GGGAAA(CT)         |
| <i>MET1</i>       | Met1-6f             | GTCAGGTATATATTTTCAGATTGTGG       |
|                   | Met1-6r             | TGTATAAGACTGACCTTTCTCTTTG        |
| <i>CMT3</i>       | CMT3-eF             | TGGTCTGTTTTAGTGTCTAGGAATA        |
|                   | CMT3-eR             | GGTCTAAAGATAAAATCCTAGGAAAA       |
| <i>Actin</i>      | Actinf250           | ATGGAAAAGATATGGCATCACAC          |
|                   | Actinr520           | GAAGAGCATAACCCCTCGTAGATT         |
| <i>GFP</i>        | GFP-NheIStop        | <u>GCTAGCTT</u> ATTGTATAGTTCATCC |
|                   | GFP-Start           | <u>GGATCC</u> ATGAGTAAAGGAGAAG   |
| <i>DDM1</i>       | DDM1f               | GAGATCTCTACCCTCCTGT              |
|                   | ddm1-2dRSa          | TGAGCTACGAGCCATGGGTTTGTGAAACGTA  |
| Athila            | Athila 817          | TGAGGATGGGATAGAATAG              |
|                   | Athila back         | ATTAATCCCTAAAACACTATCTT          |
| <i>Luciferase</i> | Lu1626B             | GGCCTTTATGAGGATCTCTCTG           |
|                   | LU8F                | ACGCCAAAAACATAAAGAAAGG           |
|                   | lucd2back           | AACT(AG)CAACTCC(AG)ATAAT         |
| <i>GUS</i>        | Gus-start           | ATAGGATCCATGTTACGTCCTGTAGAAACCC  |
|                   | Gus-stop            | ATAGGATCCTTGTTTGCCTCCCTGCTG      |
|                   | GUS1212             | GTGGTGATGTGGAGTATTG              |
|                   | GUS 1576 rev        | ATACTCTTCACTCCACAT               |
| 18SrDNA           | 18SrDNA R478        | TTAGCGACAAAGGGCTGAAT             |
|                   | 18SrDNA F214        | CGCCTCTAAGTCAGAATCCG             |

Underlined letters indicate restriction sites used for subcloning.

**Supplementary Figure 1.** Molecular characterisation of *SUVH1* and *SUVH2* mutant lines. (A) Loss-of-function and antisense lines of *SUVH1* and *SUVH2* do not affect transcription of other *SUVH* genes. Results of RT-PCR analysis with the primers indicated or listed in Supplementary Table I. (B) PCR analysis of the *suvh2* T-DNA insertional mutation SALK 079574. Specific PCR fragment amplification with primer pair CG in the SALK 079574 homozygous mutant line. The *SUVH2* specific primers F and G only amplify a *SUVH2* specific fragment in wild-type plants but not in the homozygous SALK 079574 line.

**Supplementary Figure 2.** Analysis of loss-of-function *suvh4* alleles and of the *SUVH4 kyp-2* mutation. (A) PCR and RT-PCR analysis of the T-DNA insertional *suvh4* mutations SALK 105816 and 130630. Primer pairs AB and DE do not amplify *SUVH4* specific genomic fragments in SALK 105816 and SALK 130630 homozygous mutant lines, respectively. By RT-PCR using primer pair MN no *SUVH4* transcripts are detected in the SALK 105816 and 130630 T-DNA insertional mutations. (B) Western analysis of *suvh4* SALK 105816 homozygous plants with  $\alpha$ -mono- and  $\alpha$ -dimethyl H3K9. In *suvh4* homozygous mutant plants significant reduction of dimethylated H3K9 is found. (C) Immunostaining of *suvh4* and *kyp-2* mutant plants for heterochromatin specific histone methylation marks and 5-methylcytosine does not reveal any significant differences between wild-type and homozygous mutants. (D) Immunostaining for euchromatic histone methylation marks in wild-type and *suvh4* mutant plants.

**Supplementary Figure 3** Quantification of DNA methylation by bisulfite sequence analysis. (A) DNA methylation at Athila transposon sequences in *suvh2* mutant and *SUVH2* overexpression line 35\*::*SUVH2*#5. The *suvh2* null mutant significantly reduces the DNA methylation while *SUVH2* overexpression leads to hypermethylation. Most significant effects are seen at non-symmetric cytosines. (B) DNA methylation at Athila transposon sequence in three *SUVH2* transgene mutant lines. Only the YDG domain mutant 35\*::*SUVH2*#5-2 showed a significant reduction of DNA hypermethylation. In contrast the preSET and SET domain mutants (35\*::*SUVH2*#5-4 and #5-6) do not reduce DNA hypermethylation although relaxation of Athila silencing is found (cf. Figure 5). (C) *GUS27* transgene silencing and its DNA methylation analysis in 35\*::*SUVH2*#5 overexpression and 35\*::*SUVH2as*#11

antisense plants. The *GUS27* transgene consist of three tandemly repeated copies of *GUS*, and significant enhancement of transgene silencing is observed in *SUVH2* overexpression plants. In *35\*::SUVH2#5* plants DNA hypermethylation of *GUS27* transgene is found whereas significant reduction is found in *35\*::SUVH2as#11* antisense lines in comparison to wild-type. The most significant effects are seen on non-symmetric cytosines.

Individual 5-methylcytosines are indicated by a line at the corresponding sequence position differentiating between the CpG (red), CpNpG (green) and CpNpN (blue) sequence context. Total amount of symmetric CpG (red bars) and CpNpG (green bars) and non-symmetric (blue bars) methylation is calculated for each genotype in the histogramme. We further differentiated between CpA, CpC and CpT non-symmetric DNA methylation (differentially blue coloured bars).

## T-DNA mutant alleles and antisense lines of *SUVH1* and *SUVH2*

**A**

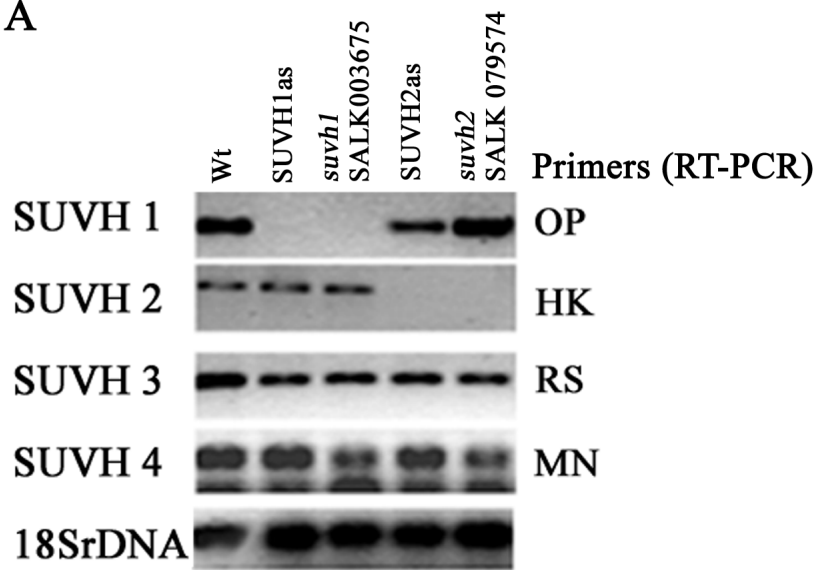

**B**

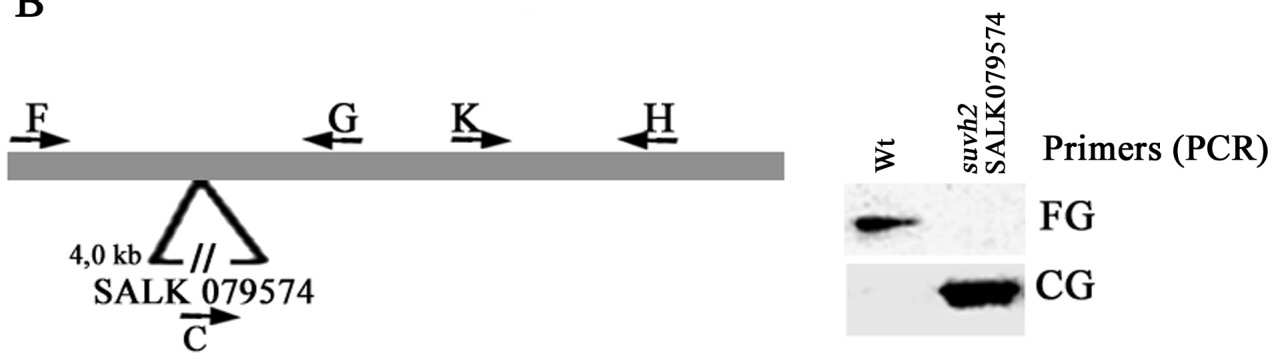

Supplementary Figure 1

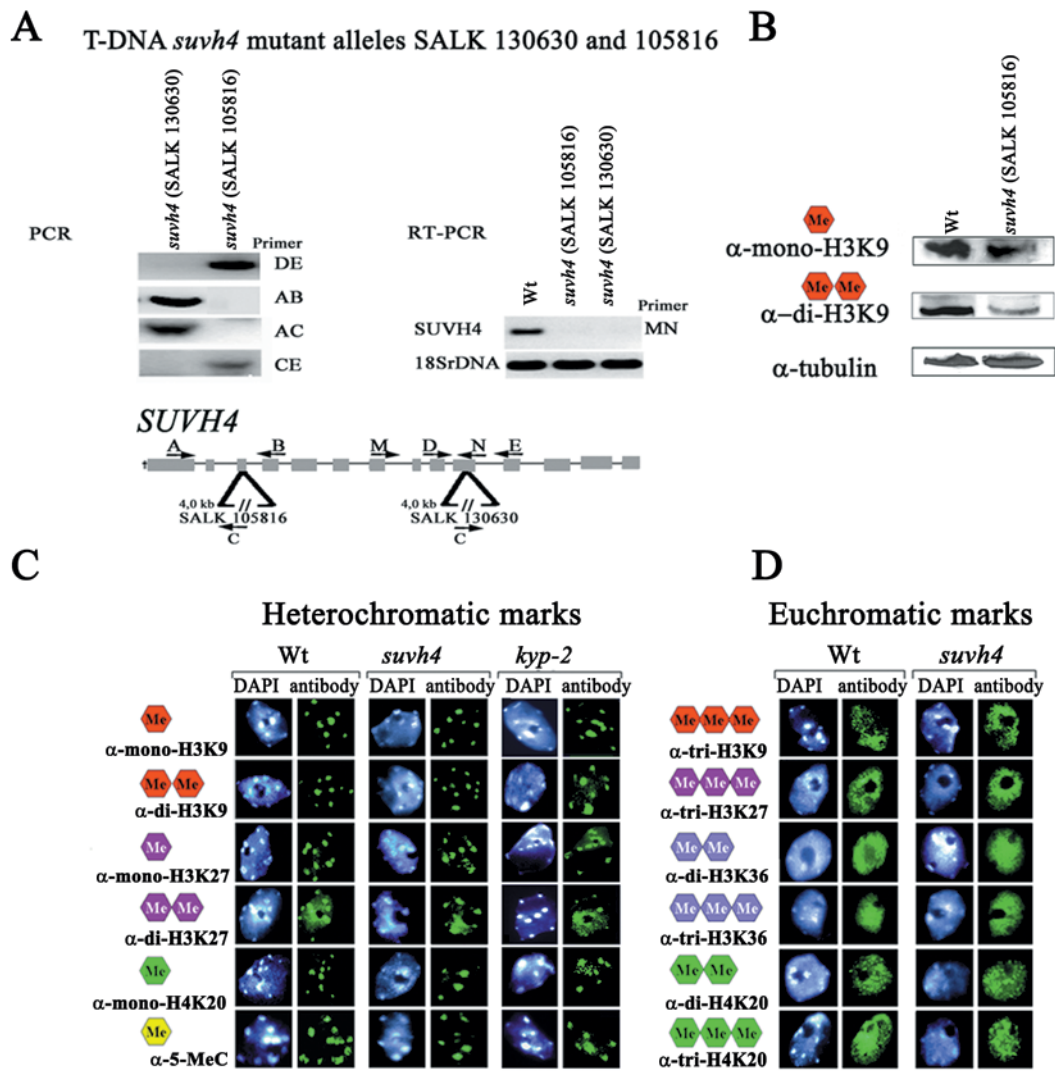

Supplementary Figure 2

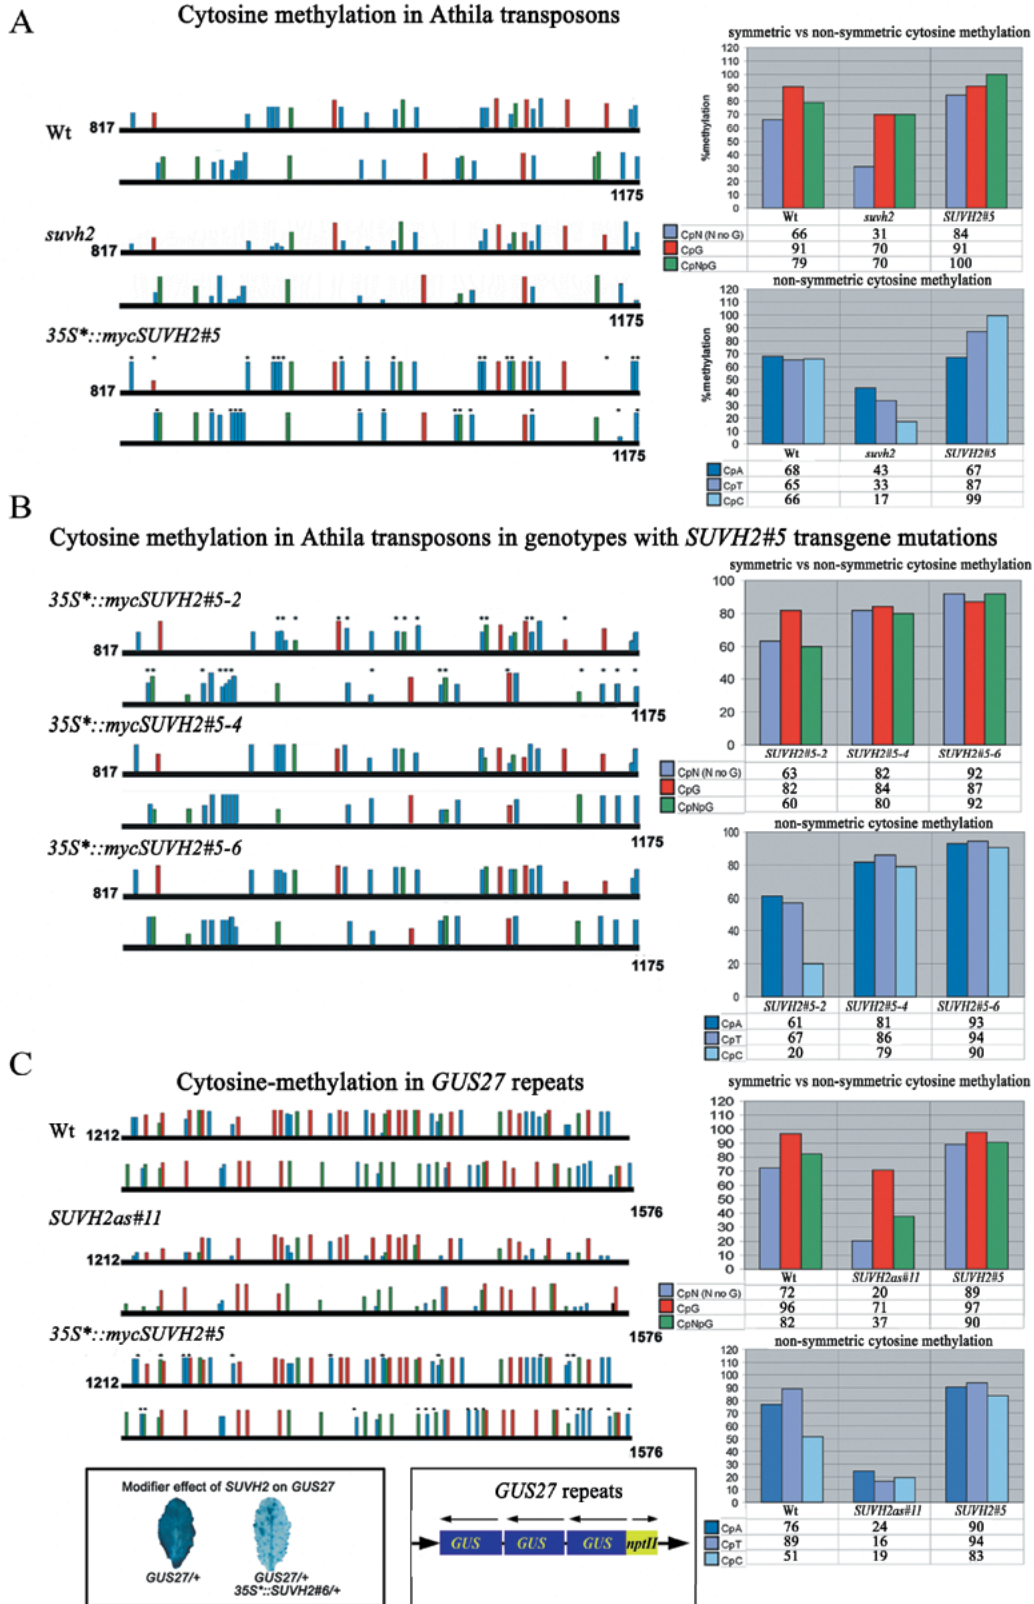

Supplementary Figure 3
